# Supplementary material
Source: publisher site journal article supplement (https://www.dovepress.com/article/359220)
Supplement: Supplementary file 1 [file get_supplementary_file.php]

**Suppl. Figure S1:** Hind paw thickness, mechanical allodynia, and weight distribution changes in sham surgery group.

**Notes:** Changes were evaluated at various time points (baseline, 6 h, POD 1, POD 4, POD 7, and POD 14) in sham animals (*n* = 5). (**A**) Ipsilateral hind paw thickness (in millimeter) measured by electronic caliper. (**B**) Ipsilateral paw withdrawal threshold following the von Frey filament stimulation. (**C**) Weight distribution ratio of the ipsilateral paw to the total body weight assessed using the advanced DWB apparatus. (**D**) Pawprint area ratio of the ipsilateral paw to the contralateral paw assessed using the DWB. Data were expressed as mean ± SEM, assessed by one-way ANOVA with repeated measures followed by Šídák’s multiple comparisons test.

**Abbreviations:** BL, baseline; POD, postoperative day.
